# Supplementary material for: An Induced Mutation in HvRECQL4 Increases the Overall Recombination and Restores Fertility in a Barley HvMLH3 Mutant Background
Source: Front Plant Sci. 2021 Nov 12;12:706560. doi: 10.3389/fpls.2021.706560 (PMC8633572; doi:10.3389/fpls.2021.706560)
Supplement: Supplementary Material 1 — Kompetitive allele-specific PCR (KASP) primer oligos (Excel). [file Data_Sheet_1.xlsx]

## Sheet: Oligos for KASP genotyping
KASP primer		L / FAM tail	R /VIC tail	Common for KASP	Comment
a	JHI-Hv50k-2016-367980	GAAGGTGACCAAGTTCATGCTACGTTATATATGGAAATGTCAGACT	GAAGGTCGGAGTCAACGGATTACGTTATATATGGAAATGTCAGACG	TGATATGAGGAAGTAGCATGTAT	KASP marker polymorphic between cv. Bowman and cv. Barke. Used for confirming F1 crosses.
	JHI-Hv50k-2016-72944	GAAGGTGACCAAGTTCATGCTACTATGCAACGAAAGAAGCAAATGA	GAAGGTCGGAGTCAACGGATTACTATGCAACGAAAGAAGCAAATGG	TGAATCTATAGCGGTCATCTAA	KASP marker polymorphic between cv. Bowman and cv. Barke. Used for confirming F1 crosses.
b	HvRecQl4_2099	GAAGGTGACCAAGTTCATGCTCCAAGCATCACACTATCATGG	GAAGGTCGGAGTCAACGGATTCACCAAGCATCACACTATCATGA	GAACTTGTGTTCTATCAAAAGGC	KASP marker targeting the recql4 mutation. Used for confirming F1 crosses, and group the F2s by genotype.
	HvMlh3_des10	GAAGGTGACCAAGTTCATGCTTCGTAAGTAGATAATGCATGTGGATG	GAAGGTCGGAGTCAACGGATTAATTTCGTAAGTAGATAATGCATGTGGATA	CTCGGTCATCATCTGATAAAACCTGAAAA	KASP marker targeting the mlh3 mutation. Used for confirming F1 crosses, and group the F2s by genotype.
