# Supplementary material for: An Induced Mutation in HvRECQL4 Increases the Overall Recombination and Restores Fertility in a Barley HvMLH3 Mutant Background
Source: Front Plant Sci. 2021 Nov 12;12:706560. doi: 10.3389/fpls.2021.706560 (PMC8633572; doi:10.3389/fpls.2021.706560)
Supplement: Supplementary Material 2 — Parameters in the raw images processed with Imaris (Excel). [file Data_Sheet_2.xlsx]

## Sheet: Imaris Parameters
Parameters in raw images were processed with Imaris deconvolution ClearView 9.5
Deconvolution - Parameters
Deconvolution Parmeters:
Parameters Set:	Standard
Algorithm:	Robust (iterative)
Number Of Iterations:	10
Acquisition Parameters:
Imaging Modality:	Laser Scanning Confocal
Wavelenght:	405 nm
Pinhole Radius (um)	24.9
Objective Lens Magnification:	63
Objective Lens NA:	1.2
Specimen Refractive Index:	1.37
Distance From Coverslip:	3.75 um
Immersion Medium:	Oil (1.52)
