# Supplementary material for: An Induced Mutation in HvRECQL4 Increases the Overall Recombination and Restores Fertility in a Barley HvMLH3 Mutant Background
Source: Front Plant Sci. 2021 Nov 12;12:706560. doi: 10.3389/fpls.2021.706560 (PMC8633572; doi:10.3389/fpls.2021.706560)
Supplement: Supplementary Table 1 — Exome capture output and mutation details of the lines selected in the suppressor screening. SuppLine2099 (first row) was selected for this study. [file Table_1.XLSX]

## Sheet: TableS1
Gene	Genome_Location	Strand	Change	CDS_Location	Reference	Mutation	Prot_Location	Ref_AA	Variant_AA	Provean_Score	Pred_Impact	Lines	AlleleDepth
HvRECQL4	chr2_part2	-	nonsynonymous	2099	C	T	700	G	D	-6.851	Deleterious	des10-sup20-Fer1	2,27
HvRECQL4	chr2_part2	-	nonsynonymous	574	G	A	192	P	S	-0.494	Neutral	des10-sup20-Fer3	0,37
Liguleless2	chr3_part2	-	nonsynonymous	40	C	T	14	A	T	-1.225	Neutral	des10-sup25-Fer1	0,7
HvFANCM	chr4_part1	-	nonsynonymous	2291	C	T	764	G	D	1.924	Neutral	des10-sup25-Fer1	0,25
HvMER3	chr4_part2	+	intron	NA	C	T	NA	NA	NA	NA	NA	des10-sup25-Fer2	0,29
HvPCH2	chr2_part2	+	synonymous	799	C	T	267	L	L	0	Neutral	des10-sup25-Fer2	13,19
REL2	chr7_part2	+	synonymous	2166	G	A	722	K	K	0	Neutral	des10-sup25-Fer3	0,18
HvFANCM	chr4_part1	-	intron	NA	C	T	NA	NA	NA	NA	NA	des10-sup25-Fer3	0,47
HvFANCM	chr4_part1	-	spliceSite	NA	C	T	NA	NA	NA	NA	NA	des10-sup25-Fer3	0,47
HvATM	chrUn	+	intron	NA	C	T	NA	NA	NA	NA	NA	des10-sup30-Fer1	1,31
