# Supplementary material for: An Induced Mutation in HvRECQL4 Increases the Overall Recombination and Restores Fertility in a Barley HvMLH3 Mutant Background
Source: Front Plant Sci. 2021 Nov 12;12:706560. doi: 10.3389/fpls.2021.706560 (PMC8633572; doi:10.3389/fpls.2021.706560)
Supplement: Supplementary Table 2 — Rescoring of chiasmata counts by using a more conservative approach of counting only the ring bivalents. [file Table_2.XLSX]

## Sheet: TableS2
Re-scoring of chiasmata	wt	mlh3	recql4	mlh3 recql4
As in Figure 3	16.5 ± 3.7	9.1 ± 1.4	18.3 ± 1.6	19.3 ± 2.1
Conservative (ring bivalent as 2 CO only)	13.9 ± 0.3	8.0 ± 1.3	14.0 ± 0.0	14.0 ± 0.0
