# Supplementary material for: An Induced Mutation in HvRECQL4 Increases the Overall Recombination and Restores Fertility in a Barley HvMLH3 Mutant Background
Source: Front Plant Sci. 2021 Nov 12;12:706560. doi: 10.3389/fpls.2021.706560 (PMC8633572; doi:10.3389/fpls.2021.706560)
Supplement: Supplementary Table 3 — Polymorphic marker summary. Details of distal regions not covered by polymorphic markers. [file Table_3.XLSX]

## Sheet: TableS3
Chromosome		1H	2H	3H	4H	5H	6H	7H
Chromosome size (Mbp) (Morex V2)		522	675	628	624	599	573	634
n. of Polymorphic markers		972	2029	1927	1273	2239	1395	2130
Zone 1: n. markers		604	943	546	275	567	353	854
Zone 2: n. markers		365	1063	1381	986	1602	934	1067
Zone 3: n. markers		3	23	0	12	70	108	209
Zone 1: SNP/Mbp		11	12.5	8.7	7	14.5	8.4	12.8
Zone 2: SNP/Mbp		1.1	2.3	3.3	2.2	3.7	2.3	2.4
Zone 3: SNP/Mbp		0	0.2	0	0.1	0.6	0.9	1.6
Chromosome start not covered		0	0	0.005	0.004	0.004	0.003	0
Chromosome end not covered		0.001	0	0.004	0	0	0.025	0
Total distal regions not covered*		0.001	0	0.01	0.004	0.004	0.027	0
