# Supplementary material for: An Induced Mutation in HvRECQL4 Increases the Overall Recombination and Restores Fertility in a Barley HvMLH3 Mutant Background
Source: Front Plant Sci. 2021 Nov 12;12:706560. doi: 10.3389/fpls.2021.706560 (PMC8633572; doi:10.3389/fpls.2021.706560)
Supplement: Supplementary Table 4 — Relative percentage of recombination contained in each genomic zone for each population. The significance is calculated by the contingency table and the chi-squared test of the proportions of recombination in each population compared to the WT control (ns = not significant, *p < 0.05, **p < 0.001). [file Table_4.XLSX]

## Sheet: TableS4
Zone	Chromosome	Population
		Wild type	recql4	recql4 mlh3	mlh3
Zone1	cM	409.9	881.2	796.1	149.4
	Relative %	0.416	0.458	0.472	0.422
	P-value	-	0.03	0.005	0.845
	Significance*	-	*	**	ns
Zone2	cM	572.9	1042.4	890.1	203.2
	Relative %	0.581	0.542	0.528	0.573
	P-value	-	0.043	0.008	0.802
	Significance*	-	*	**	ns
Zone3	cM	3.1	0.9	0	1.7
	Relative %	0.003	0	0	0.005
	P-value	-	0.065	0.021	0.644
	Significance*		ns	*	ns
Total cM		985.9	1924.5	1686.1	354.3
